# Supplementary material
Source: MDPI journal article supplement (https://www.mdpi.com/2076-3417/13/24/13228)
Supplement: s1 [file s1]

## Supporting Information

### ***Assessment of the long-term leaching behavior of incineration bottom ash: a study of two waste incinerators in Germany***

Franz-Georg Simon <sup>a, \*</sup> and Philipp Scholz <sup>a</sup>

<sup>a</sup> *BAM Bundesanstalt für Materialforschung und -prüfung, Division Contaminant Transfer and Environmental Technologies, 12200 Berlin, Germany*

\* Corresponding author.

E-Mail address: [franz-georg.simon@bam.de](mailto:franz-georg.simon@bam.de) (F. G. Simon), BAM Bundesanstalt für Materialforschung und -prüfung, Berlin, Germany

Table S1. pH values measured at the end of batch tests with samples stored outdoor and inside.

| Sample A       |                |                |               | Sample B       |                |                |               |
|----------------|----------------|----------------|---------------|----------------|----------------|----------------|---------------|
|                | Time<br>(days) | pH<br>(L/S 10) | pH<br>(L/S 2) |                | Time<br>(days) | pH<br>(L/S 10) | pH<br>(L/S 2) |
| <b>outdoor</b> | 0              | 12.32          | 12.53         | <b>outdoor</b> | 0              | 12.44          | 12.53         |
|                | 1              | 11.92          | 12.39         |                | 4              | 12.27          | 12.56         |
|                | 2              | 12.03          | 12.34         |                | 11             | 11.94          | 12.32         |
|                | 5              | 12.07          | 12.19         |                | 19             | 11.65          | 12.03         |
|                | 7              | 11.95          | 12.04         |                | 26             | 11.59          | 11.51         |
|                | 14             | 11.86          | 11.93         |                | 32             | 11.43          | 11.37         |
|                | 21             | 11.6           | 11.54         |                | 39             | 11.15          | 11.06         |
|                | 28             | 11.61          | 11.68         |                | 46             | 10.96          | 10.72         |
|                | 35             | 11.42          | 11.45         |                | 53             | 10.86          | 10.73         |
|                | 42             | 11.23          | 11.21         |                | 60             | 10.73          | 10.6          |
|                | 49             | 11.31          | 11.16         |                | 74             | 10.55          | 10.09         |
|                | 56             | 10.92          | 10.71         |                | 88             | 10.75          | 10.29         |
|                | 63             | 11.03          | 10.74         |                | 102            | 9.83           | 9.91          |
|                | 70             | 10.59          | 10.18         |                |                |                |               |
|                | 77             | 10.52          |               |                | 0              | 12.41          | 12.54         |
|                | 84             | 10.25          | 9.92          |                | 4              | 12.29          | 12.46         |
|                | 126            | 9.72           |               |                | 11             | 12.08          | 12.45         |
|                | 281            | 9.42           | 8.79          |                | 19             | 11.81          | 12.2          |
|                |                |                |               |                | 26             | 11.71          | 11.77         |
|                | 0              | 12.3           | 12.55         |                | 32             | 11.38          | 11.34         |
|                | 1              | 12.03          | 12.46         |                | 39             | 11.23          | 11.03         |
|                | 2              | 11.96          | 12.45         |                | 46             | 11.23          | 10.98         |
|                | 5              | 12.09          | 12.17         |                | 53             | 10.92          | 10.7          |
|                | 7              | 11.94          | 12.14         |                | 60             | 10.95          | 10.58         |
|                | 14             | 11.83          | 12.09         |                | 74             | 10.83          | 10.35         |
|                | 21             | 11.9           | 11.74         |                | 88             | 10.26          | 10.1          |
|                | 28             | 11.55          | 11.56         |                | 102            | 10.15          | 9.78          |
|                | 35             | 11.42          | 11.34         |                |                |                |               |
|                |                |                |               |                |                |                |               |

| Sample A      |                |                |               | Sample B      |                |                |               |
|---------------|----------------|----------------|---------------|---------------|----------------|----------------|---------------|
|               | Time<br>(days) | pH<br>(L/S 10) | pH<br>(L/S 2) |               | Time<br>(days) | pH<br>(L/S 10) | pH<br>(L/S 2) |
|               | 42             | 11.1           | 10.9          | <b>inside</b> | 0              |                |               |
|               | 49             | 11.24          | 10.96         |               | 4              | 12.44          | 12.54         |
|               | 56             | 10.99          | 10.79         |               | 11             | 12             | 12.38         |
|               | 63             | 10.96          | 10.67         |               | 19             | 11.82          | 12.13         |
|               | 70             | 10.83          | 10.4          |               | 26             | 11.83          | 11.99         |
|               | 77             | 10.85          | 10.41         |               | 32             | 11.66          | 11.57         |
|               | 84             | 10.67          | 10.31         |               | 39             | 11.19          | 10.89         |
|               | 126            | 9.92           | 9.39          |               | 46             | 11.17          | 10.93         |
|               | 281            | 9.66           | 9.02          |               | 53             |                | 10.6          |
|               |                |                |               |               | 60             | 11.32          | 11.13         |
| <b>inside</b> | 0              | 12.32          | 12.53         |               | 74             | 11.1           | 10.87         |
|               | 7              | 12.03          | 12.16         |               | 88             | 11.06          | 10.71         |
|               | 21             | 11.65          | 12.19         |               | 102            | 10.64          | 10.64         |
|               | 42             | 11.71          | 11.85         |               |                |                |               |
|               | 63             | 11.63          | 11.66         |               | 0              |                |               |
|               | 84             | 11.51          | 11.48         |               | 4              | 12.36          | 12.56         |
|               | 126            | 11.29          | 11.09         |               | 11             | 12.12          | 12.43         |
|               | 281            | 10.6           | 9.91          |               | 19             | 11.84          | 12.16         |
|               |                |                |               |               | 26             | 11.81          | 11.94         |
|               | 0              | 12.3           | 12.55         |               | 32             | 11.54          | 11.51         |
|               | 7              | 12             | 12.24         |               | 39             | 11.17          | 10.97         |
|               | 21             | 11.9           | 12.14         |               | 46             | 11.22          | 10.91         |
|               | 42             | 11.55          | 11.66         |               | 53             | 11.16          | 10.9          |
|               | 63             | 11.63          | 11.69         |               | 60             | 11.11          | 10.83         |
|               | 84             | 11.54          | 11.46         |               | 74             | 10.93          | 10.61         |
|               | 126            | 11.02          | 10.81         |               | 88             | 11.01          | 10.67         |
|               | 281            | 10.76          | 10.35         |               | 102            | 10.8           | 10.46         |

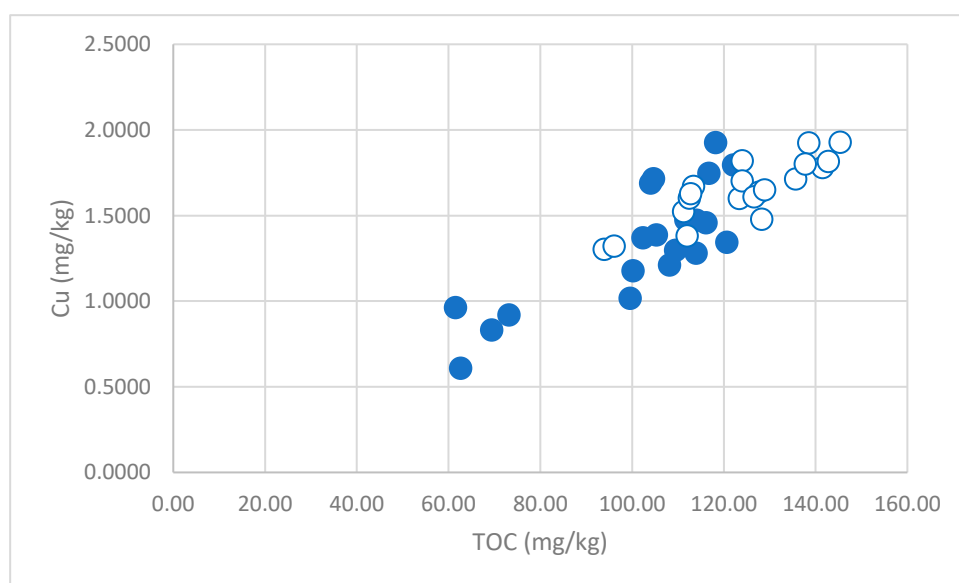

Figure S1. Measured release of copper as function of dissolved organic matter (sample B, L/S=2 L/kg, filled circles outdoor, unfilled circles indoor)

Table S2. Input parameters for modelling with Visual MINTEQ

| Input       |           | Debye-Hückel activity correction |           |             |            |          |
|-------------|-----------|----------------------------------|-----------|-------------|------------|----------|
| L/S=10 L/kg |           |                                  |           |             |            |          |
| in solution | M (g/mol) | in solution                      | in solid  | n(solv.)    | n(solid)   | sum      |
|             |           | mg/L                             | mg/0.1 kg |             |            |          |
| Cu          | 63.6      | 0.05                             | 150       | 7.86164E-07 | 0.00235849 | 2.36E-03 |
| Zn          | 65.4      | 0.2                              | 200       | 3.0581E-06  | 0.0030581  | 3.06E-03 |
| Pb          | 207.2     | 0.1                              | 50        | 4.82625E-07 | 0.00024131 | 2.42E-04 |
| Sb          | 121.8     | 0.05                             | 10        | 4.10509E-07 | 8.2102E-05 | 8.25E-05 |
| Na          | 23        | 200                              |           | 0.008695652 | 0          | 8.70E-03 |
| Cl          | 35.5      | 650                              |           | 0.018309859 | 0          | 1.83E-02 |
| Ca          | 40        | 300                              |           | 0.0075      | 0          | 7.50E-03 |
| SO4         | 96        | 200                              |           | 0.002083333 | 0          | 2.08E-03 |
| Al          | 27        | 10                               | 1500      | 3.70E-04    | 0.05555556 | 5.59E-02 |

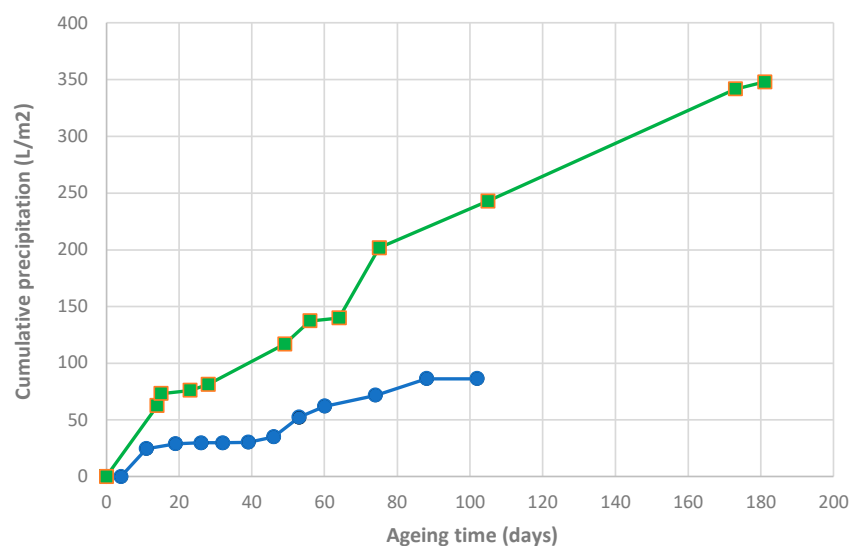

Figure S2. Rain fallen (cumulative) during outdoor storage of samples A (green squares) and B (blue circles).

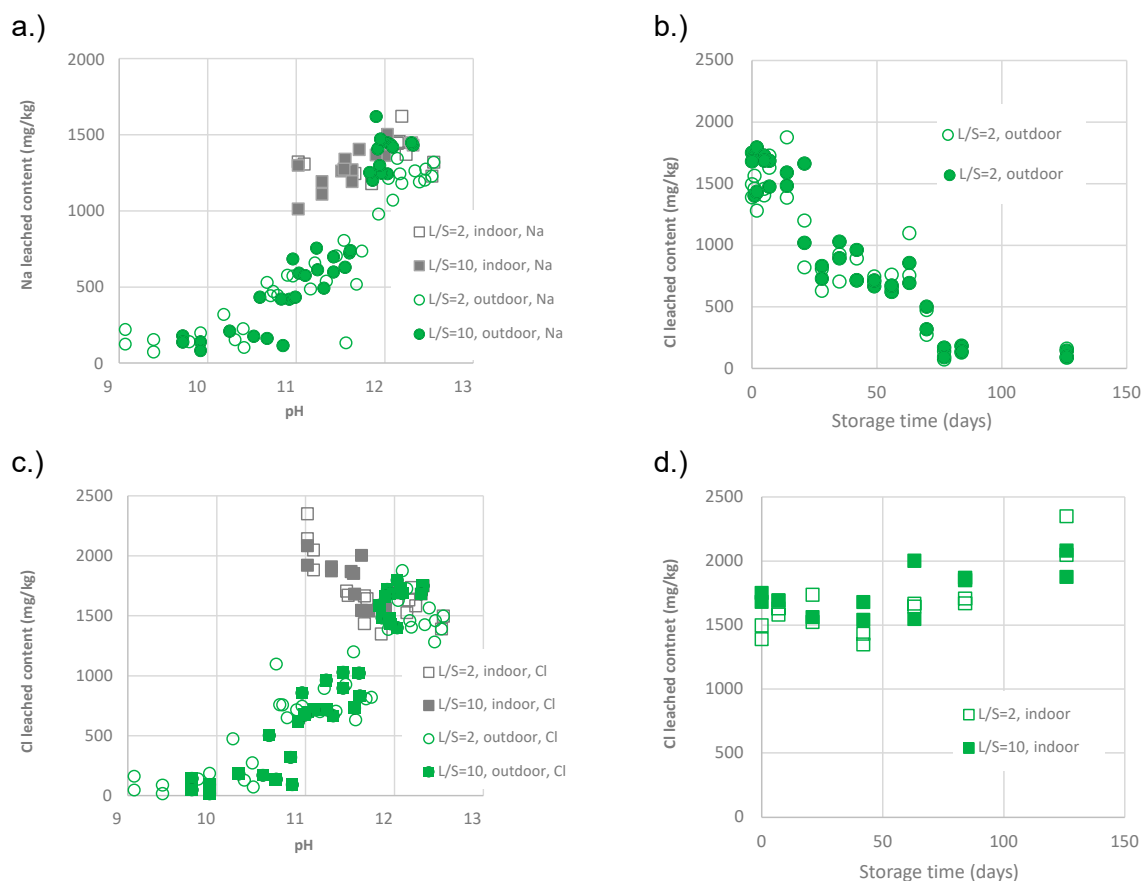

Figure S3. Released amount in mg/kg of Na (a) and Cl (b) as function of pH. The results from the samples stored indoor show that there is no pH dependence. Decreasing values are the result of wash out by rainfall. Released content of Cl as function of outdoor storage time (c) and storage time indoor (d). All results are from sample A.

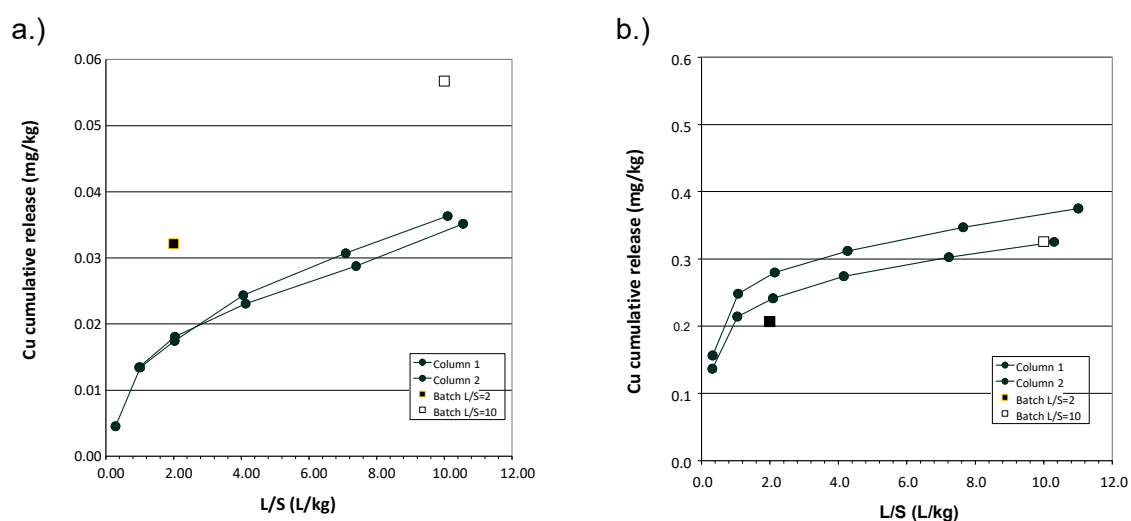

Figure S4. Cumulative release of Cu in a column test as function of the L/S ratio, sample B, unaged (a) and after 84 days storage time inside (b). The release is in both cases in the range of 400  $\mu\text{g/kg}$ .

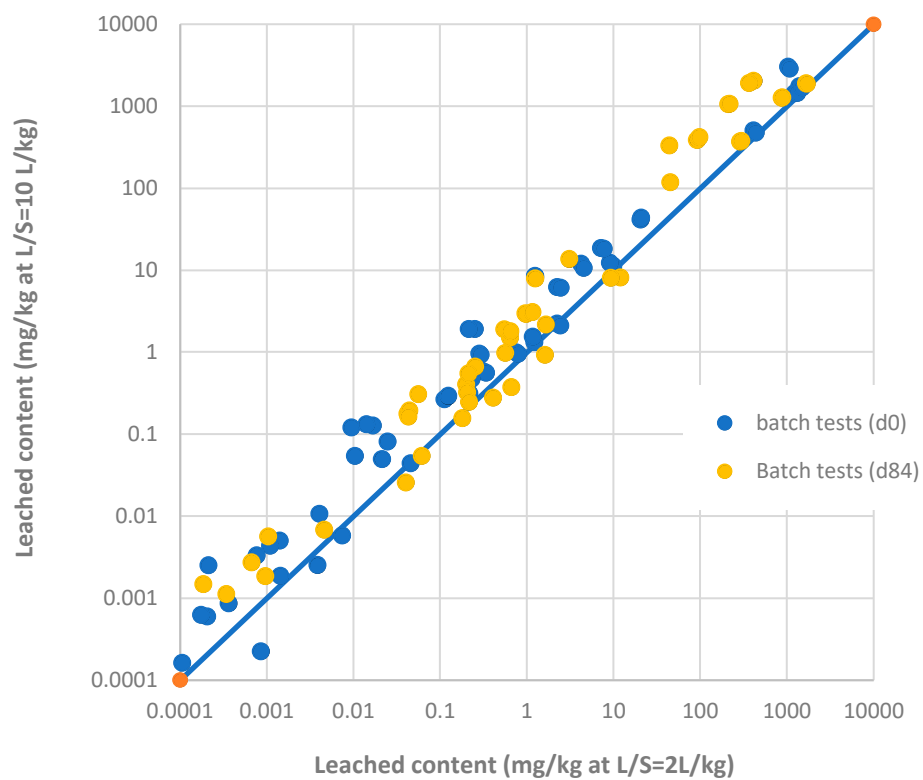

FigureS5. Plot of leached amount in batch tests at L/S=10 L/kg versus leached content at L/S=2 L/kg.

Table S3. Cumulative release (column test) resp. leached amount (batch test) in mg/kg for fresh (day 0) and aged (day 84) IBA sample A for various elements and anions. Duplicate analysis (1: lines 1-36, 2: lines 38-73).

| Sample A  |       | Fresh (day 0) |            |            |            | Aged (day 84) |            |            |            |
|-----------|-------|---------------|------------|------------|------------|---------------|------------|------------|------------|
| Parameter | Unit  | Column test   |            | Batch test |            | Column test   |            | Batch test |            |
| L/S       | L/kg  | 2             | 10         | 2          | 10         | 2             | 10         | 2          | 10         |
| As        | mg/kg | 0.00037449    | 0.00132958 | 0.00020626 | 0.0005998  | 0.00141082    | 0.01012052 |            |            |
| Ba        | mg/kg | 12.2004207    | 38.0219023 | 20.5917296 | 41.0761715 | 0.06402664    | 0.63576784 | 0.5495898  | 1.89186953 |
| Cd        | mg/kg | 0             | 0          |            |            | 2.8941E-05    | 0.00075822 | 0.00018497 | 0.00147812 |
| Cr        | mg/kg | 0.00812208    | 0.09167033 | 0.00957194 | 0.12104262 | 0.57656589    | 0.84787879 | 0.25460618 | 0.66268537 |
| Cu        | mg/kg | 0.17459486    | 0.35145439 | 0.31462205 | 0.57865404 | 0.2414226     | 0.32531102 | 0.19931991 | 0.40434546 |
| Hg        | mg/kg | 0.00046377    | 0.00138102 | 0.00021262 | 0.00252614 | 0.00143914    |            | 0.00095835 | 0.0018575  |
| Mn        | mg/kg | 0             | 0.00187801 |            | 0.00258855 | 0.00084349    | 0.0084969  |            |            |
| Mo        | mg/kg | 0.16433013    | 0.40423548 | 0.11235153 | 0.26605172 | 0.26768255    | 0.33972805 | 0.20479069 | 0.3229046  |
| Ni        | mg/kg | 0.00257616    | 0.00257616 | 0.0014161  | 0.00506795 | 0.00126838    | 0.02337609 |            | 0.02504946 |
| Pb        | mg/kg | 0.37717028    | 1.56819879 | 1.22107774 | 1.33019455 | 0             | 0.01532818 |            |            |
| Sb        | mg/kg | 0.00414342    | 0.11139327 | 0.01672522 | 0.12676181 | 0.05067979    | 0.68996408 | 0.0559901  | 0.30550111 |
| Sn        | mg/kg | 0.00128347    | 0.00467475 | 0.00388802 | 0.00253332 | 0.01040572    | 0.05575033 | 0.0045804  | 0.00682421 |
| Sr        | mg/kg | 7.23490919    | 13.0085007 | 9.99307075 | 11.2581648 | 0.82841128    | 2.86772486 | 0.9784569  | 2.91676506 |
| V         | mg/kg | 0.00015093    | 0.00322112 |            |            | 0.01104408    | 0.03994021 |            |            |
| Zn        | mg/kg | 0.06548638    | 0.83622878 | 0.25122232 | 1.91001495 | 0             | 0.11824122 | 0.04218758 | 0.17676207 |
| Co        | mg/kg | 0.00015641    | 0.00052012 | 0.00010605 | 0.00016232 | 0.00066843    | 0.00434261 |            |            |
| Al        | mg/kg | 1.07339597    | 63.9628078 | 0.65075238 | 45.0130154 | 71.4018127    | 261.766398 | 44.0027411 | 332.496517 |
| Ca        | mg/kg | 1136.48215    | 3954.96799 | 1036.27357 | 2987.95961 | 212.389279    | 798.573316 | 209.80507  | 1059.51146 |
| Fe        | mg/kg | 0             | 0          | 0.0008633  | 0.00022422 | 0             | 37.5332278 |            |            |
| K         | mg/kg | 417.969435    | 509.875039 | 407.975941 | 503.361271 | 343.828825    | 475.191407 | 289.262242 | 369.198697 |
| Mg        | mg/kg | 0             | 0          | 0.00746053 | 0.00581852 | 0.09514308    | 0.09514308 |            |            |
| Na        | mg/kg | 1157.74549    | 1322.07662 | 1228.71884 | 1433.11411 | 1234.82571    | 1358.15534 | 874.622021 | 1262.90361 |
| B         | mg/kg | 0             | 0.24258268 | 0.02462218 | 0.08156653 | 0.16999348    | 0.92706543 | 0.63936204 | 1.50878837 |
| P         | mg/kg | 0.71917963    | 0.96565669 | 0.75335877 | 0.99235664 | 0.31814944    | 0.3552943  | 1.65975916 | 2.17259425 |
| S         | mg/kg | 9.13242558    | 36.6056754 | 4.21120923 | 11.921107  | 258.109572    | 365.059629 | 91.6889469 | 383.220327 |

| Sample A  |       | Fresh (day 0) |            |            |            | Aged (day 84) |            |            |            |
|-----------|-------|---------------|------------|------------|------------|---------------|------------|------------|------------|
| Parameter | Unit  | Column test   |            | Batch test |            | Column test   |            | Batch test |            |
| L/S       | L/kg  | 2             | 10         | 2          | 10         | 2             | 10         | 2          | 10         |
| Se        | mg/kg | 0.00109105    | 0.00317603 | 0.00143192 | 0.00187075 | 0.00659785    |            | 0.04402622 | 0.19419707 |
| Si        | mg/kg | 0             | 0          | 1.25107752 | 8.37677072 | 0             | 0          | 1.25833974 | 7.90745306 |
| Ti        | mg/kg | 0.25830059    | 0.87751578 | 0.28653371 | 0.96252611 | 0.06113233    | 0.22641486 |            |            |
| Tl        | mg/kg | 2.803E-05     | 2.803E-05  |            | 0.00014391 |               |            |            |            |
| Fluoride  | mg/kg |               |            |            |            |               |            |            |            |
| Chloride  | mg/kg | 1358.71745    | 1723.71144 | 1389.36429 | 1752.14226 | 2197.7652     | 2369.12739 | 1670.52793 | 1869.23056 |
| Nitrit    | mg/kg | 2.50176343    | 3.35994894 | 2.23474109 | 6.22279266 |               |            | 0.6673982  | 0.37454166 |
| Bromide   | mg/kg | 2.55601751    | 2.56145533 | 2.23142774 | 2.2082475  | 37.5714037    | 37.8093001 | 12.0113282 | 8.13338132 |
| Nitrate   | mg/kg | 0.10901881    | 0.10901881 | 0.21706673 | 0.31104441 |               |            |            |            |
| Sulfate   | mg/kg | 21.958757     | 79.608448  | 7.16051264 | 18.5226613 | 959.617137    | 1311.15485 | 413.873884 | 2027.33445 |
| Phosphate | mg/kg |               |            |            |            | 4.03305822    | 8.00501852 | 3.08811807 | 13.5977121 |
| As        | mg/kg | 0.00048343    | 0.00133825 | 0.00017431 | 0.00062466 | 0.00184786    | 0.00613723 |            |            |
| Ba        | mg/kg | 13.3377687    | 37.6282985 | 20.9325277 | 43.7437299 | 0.07558724    | 0.78057299 | 0.64466305 | 1.79403981 |
| Cd        | mg/kg | 0             | 0          |            | 0.000475   | 1.9666E-05    | 1.9666E-05 | 0.00034113 | 0.00112496 |
| Cr        | mg/kg | 0.00959197    | 0.09706546 | 0.01040719 | 0.05417607 | 0.59385635    | 0.91714145 | 0.21181995 | 0.55131064 |
| Cu        | mg/kg | 0.18091939    | 0.36330255 | 0.3391087  | 0.55899136 | 0.27991559    | 0.37513332 | 0.21511979 | 0.2473089  |
| Hg        | mg/kg | 0.00041403    | 0.0023983  | 0.00014574 |            | 0.00183859    | 0.0081409  | 0.00066535 | 0.00273839 |
| Mn        | mg/kg | 0             | 0.00317754 |            | 0.00132414 | 0.00112       | 0.00759934 | 2.5987E-05 |            |
| Mo        | mg/kg | 0.16512512    | 0.39459541 | 0.12459954 | 0.29091152 | 0.32129451    | 0.41353338 | 0.1799204  | 0.15671221 |
| Ni        | mg/kg | 0.00257616    | 0.00257616 | 0.00110044 | 0.00433812 | 0.00152926    | 0.12415834 | 0.00283821 |            |
| Pb        | mg/kg | 0.46283388    | 1.43356125 | 1.17305275 | 1.54188298 | 0.00017225    | 0.00186682 |            |            |
| Sb        | mg/kg | 0.00137512    | 0.10963396 | 0.0142272  | 0.13220908 | 0.07759631    | 0.40932217 | 0.04303271 | 0.16419891 |
| Sn        | mg/kg | 0.00128347    | 0.00516417 | 0.004067   | 0.01064607 | 0.00465767    | 0.04697978 | 0.00103495 | 0.00563394 |
| Sr        | mg/kg | 7.18809208    | 13.1584368 | 9.09013184 | 12.2890545 | 0.78464285    | 3.20022275 | 0.96660329 | 2.97458844 |
| V         | mg/kg | 0.00015093    | 0.00394017 |            | 0.00222336 | 0.01162817    | 0.04226116 |            |            |
| Zn        | mg/kg | 0.10111185    | 0.84380566 | 0.21348988 | 1.92276836 | 0             | 0.08625365 | 0.04003732 | 0.02564662 |
| Co        | mg/kg | 0.00015738    | 0.00064661 | 9.4881E-05 | 0.000132   | 0.00078117    | 0.00224805 |            |            |

| Sample A  |       | Fresh (day 0) |            |            |            | Aged (day 84) |            |            |            |
|-----------|-------|---------------|------------|------------|------------|---------------|------------|------------|------------|
| Parameter | Unit  | Column test   |            | Batch test |            | Column test   |            | Batch test |            |
| L/S       | L/kg  | 2             | 10         | 2          | 10         | 2             | 10         | 2          | 10         |
| Al        | mg/kg | 1.05881404    | 56.8265764 | 0.54935352 | 64.191654  | 88.9739667    | 306.882591 | 45.3207322 | 118.31534  |
| Ca        | mg/kg | 1171.52829    | 3849.97703 | 1076.17633 | 2862.14656 | 192.654248    | 852.429716 | 218.228735 | 1064.27811 |
| Fe        | mg/kg | 0             | 0          | 0.00036475 | 0.00086279 | 0             | 0          |            |            |
| K         | mg/kg | 416.250626    | 510.458626 | 439.902834 | 473.29697  | 358.248003    | 501.297259 | 298.432354 | 376.349013 |
| Mg        | mg/kg | 0             | 0          | 0.04571632 | 0.04420201 | 0.10953631    | 0.10953631 |            |            |
| Na        | mg/kg | 1157.14638    | 1315.08339 | 1321.05312 | 1448.50709 | 1264.77238    | 1391.4947  | 888.956685 | 1273.92523 |
| B         | mg/kg | 0             | 0.17040523 | 0.02145822 | 0.0495105  | 0.2307624     | 1.08138517 | 0.56626311 | 0.97548531 |
| P         | mg/kg | 0.72637364    | 0.90307001 | 0.79112113 | 0.94911988 | 0.36405938    | 0.45398241 | 1.62359615 | 0.92772898 |
| S         | mg/kg | 8.95988683    | 38.7106641 | 4.52598624 | 10.5463668 | 256.790882    | 361.469641 | 97.8445148 | 417.032229 |
| Se        | mg/kg | 0.00109105    | 0.00378624 | 0.00076546 | 0.0033121  | 0.00818415    | 0.0128204  | 0.06158761 | 0.05444828 |
| Si        | mg/kg | 0             | 0          | 1.24741144 | 8.42404929 | 0             | 0          | 1.16639974 | 3.09578033 |
| Ti        | mg/kg | 0.27914381    | 0.85409743 | 0.29294182 | 0.92343859 | 0.05800426    | 0.23695412 |            |            |
| Tl        | mg/kg | 2.803E-05     | 2.803E-05  |            | 6.6232E-05 |               |            |            |            |
| Fluoride  | mg/kg |               |            |            |            |               |            |            |            |
| Chloride  | mg/kg | 1371.37257    | 1709.1953  | 1496.96992 | 1682.03876 | 2202.32528    | 2405.47034 | 1705.75816 | 1852.5241  |
| Nitrit    | mg/kg | 2.44308203    | 3.41367638 | 2.45022134 | 6.1005772  |               |            | 0.40968696 | 0.27841673 |
| Bromide   | mg/kg | 2.56145533    | 2.55601751 | 2.44256473 | 2.12010945 | 35.7548413    | 36.1408724 | 9.30000105 | 8.04982336 |
| Nitrate   | mg/kg | 0.10901881    | 0.10901881 | 0.23280801 | 0.47180247 |               |            |            |            |
| Sulfate   | mg/kg | 21.2791885    | 80.9949205 | 7.73288996 | 18.3109124 | 917.31531     | 1258.54245 | 366.764431 | 1889.92572 |
| Phosphate | mg/kg |               |            |            |            | 4.14906498    | 7.02707382 |            | 13.8190042 |
